# Supplementary material for: Trends in excess mortality associated with atrial fibrillation over 45 years (Framingham Heart Study): community based cohort study
Source: PubMed Central journal article supplement — BMJ. 2020 Aug 11;370:m2724. doi: 10.1136/bmj.m2724 (PMC7418071; doi:10.1136/bmj.m2724), 2020-08-11

**Supplementary Material**

**Table of contents**

|                                                                                                                                                  |    |
|--------------------------------------------------------------------------------------------------------------------------------------------------|----|
| Table S1. Framingham Heart Study examinations .....                                                                                              | 2  |
| Table S2. Contributions of participants to different age periods across epochs. ....                                                             | 3  |
| Table S3. Characteristics of AF cases ascertained from routine Framingham clinic visits and outside medical records. ...                         | 4  |
| Table S4. Characteristics of AF cases with and without a secondary precipitant. ....                                                             | 5  |
| Table S5. Characteristics of AF cases and matched referents. ....                                                                                | 6  |
| Table S6. Association between newly-diagnosed AF and death using the matched cohort design. ....                                                 | 7  |
| Table S7. Ratio of hazard ratios in women versus men. ....                                                                                       | 7  |
| Table S8. Association between newly-diagnosed AF and all-cause mortality, after excluding participants who died within 30 days of AF onset. .... | 7  |
| Table S9. Association between new-onset AF detected from outside medical records and all-cause mortality .....                                   | 7  |
| Table S10. Association between new-onset AF without secondary precipitants and all-cause mortality .....                                         | 8  |
| Table S11. Association between AF and cause-specific death using the matched cohort design. ....                                                 | 8  |
| Figure S1. Diagram depicting the cohort study design and contribution of participants to the epochs. ....                                        | 9  |
| Figure S2. Diagram depicting the matched cohort study design and contribution of participants to the epochs. ....                                | 10 |
| Figure S3. Illness-death model. ....                                                                                                             | 11 |
| Figure S4. Flow diagrams depicting the selection of participants. ....                                                                           | 12 |
| Figure S5. Adjusted survival curves for women with atrial fibrillation and matched referents. ....                                               | 13 |
| Figure S6. Adjusted survival curves for men with atrial fibrillation and matched referents. ....                                                 | 14 |
| Figure S7. Adjusted survival curves for AF cases detected from outside medical records and matched referents. ....                               | 15 |
| Figure S8. Adjusted survival curves for AF cases without secondary precipitants and matched referents. ....                                      | 16 |
| Figure S9. Cumulative incidence function for cardiovascular death. ....                                                                          | 17 |
| Figure S10. Cumulative incidence function for non-cardiovascular death. ....                                                                     | 18 |

**Supplement—Vinter et al. Temporal trends in the association between newly-diagnosed AF and death**

**Table S1. Framingham Heart Study examinations**

| Original cohort             |           |        |      | Offspring cohort |           |       |      | Third Generation cohort |           |       |      |
|-----------------------------|-----------|--------|------|------------------|-----------|-------|------|-------------------------|-----------|-------|------|
| Exam                        | Years     | Age    | N    | Exam             | Years     | Age   | N    | Exam                    | Years     | Age   | N    |
| 13                          | 1972-1976 | 53-85  | 3133 | 1                | 1971-1975 | 5-70  | 5124 | 1                       | 2002-2005 | 19-72 | 4095 |
| 14                          | 1975-1978 | 55-88  | 2871 | 2                | 1979-1983 | 17-77 | 3863 | 2                       | 2008-2011 | 24-78 | 3411 |
| 15                          | 1977-1979 | 57-89  | 2632 | 3                | 1983-1987 | 18-77 | 3873 |                         |           |       |      |
| 16                          | 1979-1982 | 59-91  | 2351 | 4                | 1987-1991 | 22-81 | 4019 |                         |           |       |      |
| 17                          | 1981-1984 | 61-93  | 2179 | 5                | 1991-1995 | 26-84 | 3799 |                         |           |       |      |
| 18                          | 1983-1985 | 63-94  | 1825 | 6                | 1995-1998 | 29-86 | 3532 |                         |           |       |      |
| 19                          | 1985-1988 | 65-96  | 1541 | 7                | 1998-2001 | 33-90 | 3539 |                         |           |       |      |
| 20                          | 1986-1990 | 67-97  | 1401 | 8                | 2005-2008 | 40-93 | 3021 |                         |           |       |      |
| 21                          | 1988-1992 | 69-99  | 1319 | 9                | 2011-2014 | 46-98 | 2430 |                         |           |       |      |
| 22                          | 1990-1994 | 72-101 | 1166 |                  |           |       |      |                         |           |       |      |
| 23                          | 1992-1996 | 73-101 | 1026 |                  |           |       |      |                         |           |       |      |
| 24                          | 1995-1998 | 76-103 | 831  |                  |           |       |      |                         |           |       |      |
| 25                          | 1997-1999 | 78-104 | 703  |                  |           |       |      |                         |           |       |      |
| 26                          | 1999-2001 | 79-103 | 558  |                  |           |       |      |                         |           |       |      |
| 27                          | 2002-2003 | 82-104 | 414  |                  |           |       |      |                         |           |       |      |
| 28                          | 2004-1005 | 84-104 | 303  |                  |           |       |      |                         |           |       |      |
| New Offspring Spouse cohort |           |        |      | Omni 1 cohort    |           |       |      | Omni 2 cohort           |           |       |      |
| 1                           | 2003-2005 | 47-85  | 103  | 1                | 1994-1998 | 27-78 | 506  | 1                       | 2003-2005 | 20-80 | 410  |
| 2                           | 2008-2011 | 53-90  | 68   | 2                | 1999-2001 | 33-83 | 405  | 2                       | 2009-2011 | 25-85 | 321  |
|                             |           |        |      | 3                | 2007-2008 | 39-89 | 298  |                         |           |       |      |
|                             |           |        |      | 4                | 2011-2014 | 44-88 | 301  |                         |           |       |      |

Data show the number of FHS participants who attended each exam and their age range. For each epoch, we selected AF-free participants aged 45 years or older at the first exam attended within the epoch, i.e. 1972-1985 for epoch 1, 1986-2000 for epoch 2, and 2001-2015 for epoch 3.

**Supplement—Vinter et al. Temporal trends in the association between newly-diagnosed AF and death**

**Table S2. Contributions of participants to different age periods across epochs**

| Epoch 1 | Epoch 2 | Epoch 3 |        |
|---------|---------|---------|--------|
| ✓       |         |         | N=1862 |
| ✓       | ✓       |         | N=2246 |
| ✓       |         | ✓       | N=17   |
| ✓       | ✓       | ✓       | N=1546 |
|         | ✓       |         | N=534  |
|         | ✓       | ✓       | N=1851 |
|         |         | ✓       | N=2760 |
| N=5671  | N=6177  | N=6174  |        |

Of 5671 participants contributing to epoch 1, 3792 (67%) contributed to subsequent age periods in epoch 2. Of 6177 participants contributing to epoch 2, 3397 (55%) contributed to subsequent age periods in epoch 3.

**Supplement—Vinter et al. Temporal trends in the association between newly-diagnosed AF and death**

**Table S3. Characteristics of AF cases ascertained from routine Framingham clinic visits and outside medical records**

|                                    | AF cases detected during study visit |                      |                      | AF cases detected outside of study visits |                      |                      |
|------------------------------------|--------------------------------------|----------------------|----------------------|-------------------------------------------|----------------------|----------------------|
|                                    | Epoch 1<br>1972-1985                 | Epoch 2<br>1986-2000 | Epoch 3<br>2001-2015 | Epoch 1<br>1972-1985                      | Epoch 2<br>1986-2000 | Epoch 3<br>2001-2015 |
|                                    | n= 66                                | n=43                 | n=7                  | n=239                                     | n=553                | n=461                |
| Age, years                         | 73.6 (8.3)                           | 77.2 (10.5)          | 80.4 (12.8)          | 74.6 (9.9)                                | 76.5 (10.5)          | 77.7 (10.7)          |
| Female                             | 43.9                                 | 39.5                 | 14.3                 | 49.4                                      | 46.3                 | 46.2                 |
| Systolic BP, mmHg                  | 141 (21)                             | 136 (22)             | 129 (15)             | 146 (23)                                  | 142 (22)             | 136 (20)             |
| Diastolic BP, mmHg                 | 80 (12)                              | 78 (12)              | 66 (9)               | 77 (12)                                   | 73 (11)              | 71 (11)              |
| Body mass index, kg/m <sup>2</sup> | 26.4 (4.2)                           | 29.3 (6.8)           | 28.1 (7.9)           | 26.3 (4.6)                                | 27.5 (4.7)           | 28.8 (5.6)           |
| Total cholesterol                  | 211.7 (42.3)                         | 181.2 (35.5)         | 165.6 (45.5)         | 222.7 (50.9)                              | 203.8 (40.6)         | 176.7 (33.0)         |
| Education                          |                                      |                      |                      |                                           |                      |                      |
| No high school degree              | 38.7                                 | 23.7                 | 28.6                 | 43.6                                      | 29.0                 | 10.2                 |
| High school degree only            | 30.7                                 | 34.2                 | 14.3                 | 28.4                                      | 33.0                 | 33.0                 |
| Some college                       | 16.1                                 | 23.7                 | 42.8                 | 16.9                                      | 20.3                 | 22.2                 |
| College graduate                   | 14.5                                 | 18.4                 | 14.3                 | 11.1                                      | 17.7                 | 34.6                 |
| Statin use                         | 0                                    | 7.0                  | 42.9                 | 2.1                                       | 8.1                  | 48.6                 |
| Current smoker                     | 19.1                                 | 7.0                  | 0                    | 20.4                                      | 12.9                 | 6.7                  |
| Diabetes                           | 11.1                                 | 15.2                 | 0                    | 12.7                                      | 17.9                 | 22.9                 |
| Hypertension treatment             | 47.7                                 | 57.1                 | 42.9                 | 43.5                                      | 56.4                 | 65.7                 |
| Prior heart failure                | 6.1                                  | 9.3                  | 14.3                 | 9.2                                       | 6.5                  | 4.3                  |
| Prior myocardial infarction        | 9.1                                  | 4.7                  | 28.6                 | 16.7                                      | 15.9                 | 8.5                  |
| Prior stroke/TIA, %                | 10.6                                 | 9.3                  | 28.6                 | 13.0                                      | 10.7                 | 8.5                  |

'Data are mean (standard deviation) or percentages. BP = blood pressure; TIA = transient ischemic attack

**Supplement—Vinter et al. Temporal trends in the association between newly-diagnosed AF and death**

**Table S4. Characteristics of AF cases with and without a secondary precipitant**

|                                    | Secondary AF cases   |                      |                      | Non-secondary AF cases |                      |                      |
|------------------------------------|----------------------|----------------------|----------------------|------------------------|----------------------|----------------------|
|                                    | Epoch 1<br>1972-1985 | Epoch 2<br>1986-2000 | Epoch 3<br>2001-2015 | Epoch 1<br>1972-1985   | Epoch 2<br>1986-2000 | Epoch 3<br>2001-2015 |
|                                    | n= 105               | n=265                | n=201                | n=200                  | n=331                | n=267                |
| Age, years                         | 73.6 (9.6)           | 75.4 (9.9)           | 78.7 (10.3)          | 74.8 (9.5)             | 77.5 (10.8)          | 77.0 (10.9)          |
| Female                             | 42.9                 | 39.3                 | 42.8                 | 51.0                   | 51.1                 | 47.9                 |
| Systolic BP, mmHg                  | 144 (23)             | 140 (22)             | 135 (19)             | 145 (22)               | 143 (22)             | 136 (21)             |
| Diastolic BP, mmHg                 | 76 (12)              | 73 (11)              | 70 (10)              | 78 (12)                | 74 (11)              | 72 (11)              |
| Body mass index, kg/m <sup>2</sup> | 26.9 (5.0)           | 27.4 (4.9)           | 29.2 (5.9)           | 26.0 (4.2)             | 27.9 (5.0)           | 28.5 (5.4)           |
| Total cholesterol                  | 218.6 (47.5)         | 208.6 (42.9)         | 173.6 (33.0)         | 221.1 (50.2)           | 196.8 (37.9)         | 178.7 (33.1)         |
| Education                          |                      |                      |                      |                        |                      |                      |
| No high school degree              | 44.9                 | 28.9                 | 10.6                 | 41.3                   | 28.4                 | 10.4                 |
| High school degree only            | 26.5                 | 30.8                 | 34.9                 | 30.1                   | 35.0                 | 31.2                 |
| Some college                       | 15.3                 | 22.5                 | 19.6                 | 17.5                   | 18.9                 | 24.6                 |
| College graduate                   | 13.3                 | 17.8                 | 34.9                 | 11.1                   | 17.7                 | 33.8                 |
| Statin use                         | 1.9                  | 9.4                  | 53.2                 | 1.5                    | 7.0                  | 44.9                 |
| Current smoker                     | 25.2                 | 18.9                 | 11.0                 | 17.3                   | 7.3                  | 3.4                  |
| Diabetes                           | 12.5                 | 20.9                 | 24.6                 | 12.2                   | 14.9                 | 21.1                 |
| Hypertension treatment             | 46.2                 | 57.3                 | 63.3                 | 43.4                   | 55.9                 | 66.8                 |
| Prior heart failure                | 8.6                  | 5.3                  | 4.5                  | 8.5                    | 7.9                  | 4.5                  |
| Prior myocardial infarction        | 19.1                 | 18.9                 | 8.5                  | 13.0                   | 12.1                 | 9.0                  |
| Prior stroke/TIA, %                | 13.3                 | 9.1                  | 10.0                 | 12.0                   | 11.8                 | 7.9                  |

'Data are mean (standard deviation) or percentages. BP = blood pressure; TIA = transient ischemic attack

**Supplement—Vinter et al. Temporal trends in the association between newly-diagnosed AF and death**

**Table S5. Characteristics of AF cases and matched referents**

|                             | Epoch 1<br>1972-1985 |                      | Epoch 2<br>1986-2000 |                       | Epoch 3<br>2001-2015 |                      |
|-----------------------------|----------------------|----------------------|----------------------|-----------------------|----------------------|----------------------|
|                             | AF cases<br>n=305    | AF controls<br>n=610 | AF cases<br>n=589    | AF controls<br>n=1170 | AF cases<br>n=453    | AF controls<br>n=892 |
| Age (years)                 | 73.9 (9.6)           | 73.9 (9.6)           | 75.9 (10.3)          | 75.8 (10.3)           | 76.6 (10.3)          | 76.5 (10.3)          |
| Female                      | 48.2                 | 48.2                 | 45.5                 | 45.6                  | 44.6                 | 44.5                 |
| Systolic BP (mmHg)          | 145 (23)             | 142 (21)             | 142 (22)             | 139 (21)              | 135 (20)             | 133 (18)             |
| Diastolic BP (mmHg)         | 77 (12)              | 76 (10)              | 74 (11)              | 73 (11)               | 71 (11)              | 70 (11)              |
| BMI (kg/m <sup>2</sup> )    | 26.3 (4.5)           | 26.2 (4.1)           | 27.7 (4.9)           | 27.1 (4.5)            | 28.9 (5.7)           | 27.8 (4.9)           |
| Total cholesterol           | 220.2 (49.2)         | 224.8 (40.6)         | 202.0 (40.4)         | 205.6 (40.6)          | 176.3 (33.3)         | 180.1 (35.9)         |
| Education                   |                      |                      |                      |                       |                      |                      |
| No high school degree       | 42.5                 | 45.0                 | 28.5                 | 27.6                  | 9.9                  | 10.2                 |
| High school degree only     | 28.9                 | 24.9                 | 33.3                 | 33.3                  | 33.2                 | 32.1                 |
| Some college                | 16.7                 | 15.1                 | 20.3                 | 19.4                  | 22.1                 | 26.4                 |
| College graduate            | 11.9                 | 15.0                 | 17.9                 | 19.7                  | 34.8                 | 31.3                 |
| Statin use                  | 1.7                  | 1.3                  | 8.2                  | 10.1                  | 48.8                 | 45.3                 |
| Current smoker              | 20.1                 | 19.7                 | 12.6                 | 6.6                   | 6.8                  | 5.4                  |
| Diabetes                    | 12.3                 | 8.1                  | 17.8                 | 12.1                  | 22.4                 | 15.0                 |
| Hypertension treatment      | 44.4                 | 34.7                 | 56.5                 | 47.6                  | 64.4                 | 59.9                 |
| Prior heart failure         | 8.5                  | 3.1                  | 6.6                  | 3.4                   | 4.4                  | 3.7                  |
| Prior myocardial infarction | 15.1                 | 12.1                 | 15.1                 | 11.2                  | 8.6                  | 5.7                  |
| Prior stroke/TIA            | 12.5                 | 6.9                  | 10.5                 | 9.6                   | 8.6                  | 5.9                  |

'Data are mean (standard deviation) or percentages. AF = atrial fibrillation; BP = blood pressure; TIA = transient ischemic attack

Percentages of missing values for each epoch: body mass index = 6.7%, 14.2%, and 14.7%; total cholesterol = 5.8%, 14.8%, and 14.6%; Systolic BP = 0.3%, 2.9%, and 0.2%; Diastolic BP = 0.3%, 3.0%, and 0.2%; education = 3.6%, 4.0%, and 3.1%; statin use = 0.5%, 0.2%, and 0.1%; smoking = 3.4%, 0.2%, and 0.1%; diabetes = 7.2%, 23.1%, and 14.0%; hypertension treatment = 0.8%, 1.5%, and 0.7%, respectively.

**Supplement—Vinter et al. Temporal trends in the association between newly-diagnosed AF and death**

**Table S6. Association between newly-diagnosed AF and death using the matched cohort design**

| Epochs    | Cases |        | Referents |        | Age- and sex-adjusted model | Adjusted for covariates at AF onset |
|-----------|-------|--------|-----------|--------|-----------------------------|-------------------------------------|
|           | n     | deaths | n         | deaths |                             |                                     |
| 1972-1985 | 305   | 161    | 610       | 133    | 5.13 (3.67, 7.18)           | 4.72 (3.29, 6.77)                   |
| 1986-2000 | 589   | 292    | 1170      | 286    | 3.52 (2.81, 4.42)           | 3.57 (2.79, 4.57)                   |
| 2001-2015 | 453   | 189    | 892       | 230    | 3.55 (2.71, 4.67)           | 4.05 (2.96, 5.53)                   |

Data are hazard ratios (95% confidence intervals) for the association between AF and death. Models 2 is adjusted for clinical covariates listed in table S1.

**Table S7. Ratio of hazard ratios in women versus men**

|           | Age-adjusted model | P     | Adjusted for covariates at entry | p     | Adjusted for time-varying covariates | p      |
|-----------|--------------------|-------|----------------------------------|-------|--------------------------------------|--------|
| 1972-1985 | 1.31 (0.92, 1.84)  | 0.13  | 1.24 (0.87, 1.77)                | 0.23  | 1.30 (0.99, 1.72)                    | 0.06   |
| 1986-2000 | 1.49 (1.15, 1.94)  | 0.003 | 1.54 (1.19, 2.00)                | 0.001 | 1.41 (1.16, 1.70)                    | 0.0005 |
| 2001-2015 | 0.83 (0.61, 1.15)  | 0.26  | 0.93 (0.67, 1.29)                | 0.66  | 0.76 (0.57, 1.02)                    | 0.07   |

**Table S8. Association between newly-diagnosed AF and all-cause mortality, after excluding participants who died within 30 days of AF onset**

| Epochs    | n    | deaths | Age-adjusted model | Adjusted for covariates at entry | Adjusted for time-varying covariates |
|-----------|------|--------|--------------------|----------------------------------|--------------------------------------|
| 1972-1985 | 5478 | 1011   | 2.61 (2.15, 3.18)  | 2.42 (1.99, 2.94)                | 1.66 (1.43, 1.92)                    |
| 1986-2000 | 6041 | 1297   | 1.85 (1.60, 2.13)  | 1.78 (1.54, 2.05)                | 1.26 (1.14, 1.39)                    |
| 2001-2015 | 6123 | 871    | 1.61 (1.35, 1.92)  | 1.58 (1.32, 1.89)                | 1.41 (1.21, 1.65)                    |
| Trend P   |      |        | 0.0006             | 0.002                            | 0.48                                 |

Data are hazard ratios (95% confidence intervals) for the association between time-varying AF and death. Models 2 and 3 are adjusted for clinical covariates listed in table S1.

**Table S9. Association between new-onset AF detected from outside medical records and all-cause mortality**

| Epochs    | n    | deaths | Age-adjusted model | Adjusted for covariates at entry | Adjusted for time-varying covariates |
|-----------|------|--------|--------------------|----------------------------------|--------------------------------------|
| 1972-1985 | 5671 | 1031   | 4.71 (3.93, 5.65)  | 4.11 (3.42, 4.95)                | 2.36 (2.04, 2.74)                    |
| 1986-2000 | 6177 | 1336   | 2.49 (2.18, 2.85)  | 2.39 (2.09, 2.73)                | 1.45 (1.31, 1.60)                    |
| 2001-2015 | 6174 | 918    | 2.04 (1.74, 2.39)  | 2.05 (1.74, 2.41)                | 1.73 (1.50, 2.00)                    |
| Trend P   |      |        | 0.001              | 0.003                            | 0.42                                 |

Data are hazard ratios (95% confidence intervals) for the association between time-varying AF and death. We censored AF cases detected during a Framingham Heart Study visit at the time of diagnosis. Models 2 and 3 are adjusted for clinical covariates listed in table 1. Linear trends across the epochs were tested by using meta-regression models of log hazard ratios.

**Supplement—Vinter et al. Temporal trends in the association between newly-diagnosed AF and death**

**Table S10. Association between new-onset AF without secondary precipitants and all-cause mortality**

| Epochs    | n    | deaths | Age-              | Adjusted for covariates at entry | Adjusted for            |
|-----------|------|--------|-------------------|----------------------------------|-------------------------|
|           |      |        | adjusted model    |                                  | time-varying covariates |
| 1972-1985 | 5671 | 988    | 3.68 (2.97, 4.57) | 3.18 (2.55, 3.97)                | 2.02 (1.70, 2.41)       |
| 1986-2000 | 6177 | 1216   | 2.25 (1.89, 2.66) | 2.19 (1.84, 2.60)                | 1.54 (1.36, 1.73)       |
| 2001-2015 | 6174 | 821    | 1.99 (1.61, 2.46) | 2.06 (1.66, 2.55)                | 1.68 (1.39, 2.04)       |
| Trend P   |      |        | 0.007             | 0.03                             | 0.40                    |

Data are hazard ratios (95% confidence intervals) for the association between time-varying AF and death. We censored AF cases associated with an acute reversible precipitant at the time of diagnosis. Models 2 and 3 are adjusted for clinical covariates listed in table 1. Linear trends across the epochs were tested by using meta-regression models of log hazard ratios.

**Table S11. Association between AF and cause-specific death using the matched cohort design**

| Epochs    | Cardiovascular disease deaths |        |           |        |                                 |                                        | Non-cardiovascular disease deaths |        |           |        |                                 |                                        |
|-----------|-------------------------------|--------|-----------|--------|---------------------------------|----------------------------------------|-----------------------------------|--------|-----------|--------|---------------------------------|----------------------------------------|
|           | Cases                         |        | Referents |        | Age- and sex-<br>adjusted model | Adjusted for<br>covariates at AF onset | Cases                             |        | Referents |        | Age- and sex-<br>adjusted model | Adjusted for<br>covariates at AF onset |
|           | n                             | deaths | n         | deaths |                                 |                                        | n                                 | deaths | n         | deaths |                                 |                                        |
| 1972-1985 | 305                           | 84     | 610       | 56     | 4.82 (3.07, 7.56)               | 4.67 (2.73, 7.98)                      | 305                               | 77     | 610       | 79     | 5.54 (3.35, 9.17)               | 5.76 (3.25, 10.22)                     |
| 1986-2000 | 589                           | 102    | 1170      | 74     | 4.48 (2.98, 6.75)               | 4.66 (2.78, 7.79)                      | 589                               | 190    | 1170      | 220    | 3.15 (2.40, 4.13)               | 3.40 (2.51, 4.61)                      |
| 2001-2015 | 453                           | 69     | 892       | 28     | 9.45 (4.96, 18.01)              | 10.90 (4.67, 25.41)                    | 453                               | 120    | 892       | 179    | 2.59 (1.90, 3.53)               | 3.13 (2.18, 4.50)                      |

Hazard ratios (95% confidence interval) from an illness-death model estimated via cause-specific Cox regression. Abbreviation: CVD = cardiovascular disease. Model 2 is adjusted for clinical covariates listed in table S1.



Supplement—Vinter et al. Temporal trends in the association between newly-diagnosed AF and death

Figure S1. Diagram depicting the cohort study design and contribution of participants to the epochs

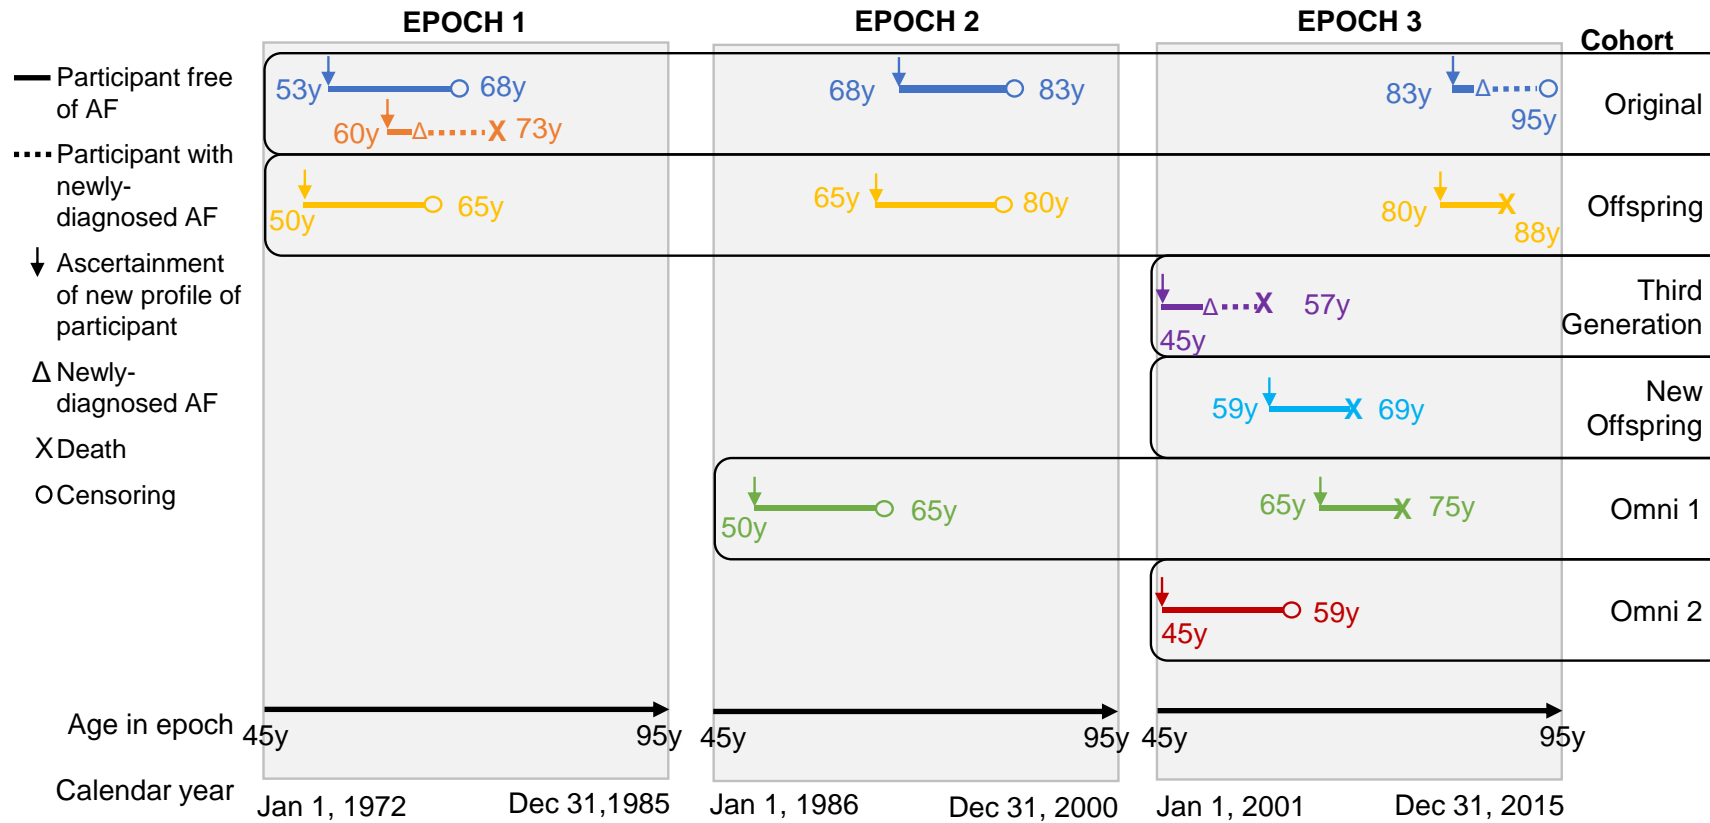

Supplement—Vinter et al. Temporal trends in the association between newly-diagnosed AF and death

Figure S2. Diagram depicting the matched cohort study design and contribution of participants to the epochs

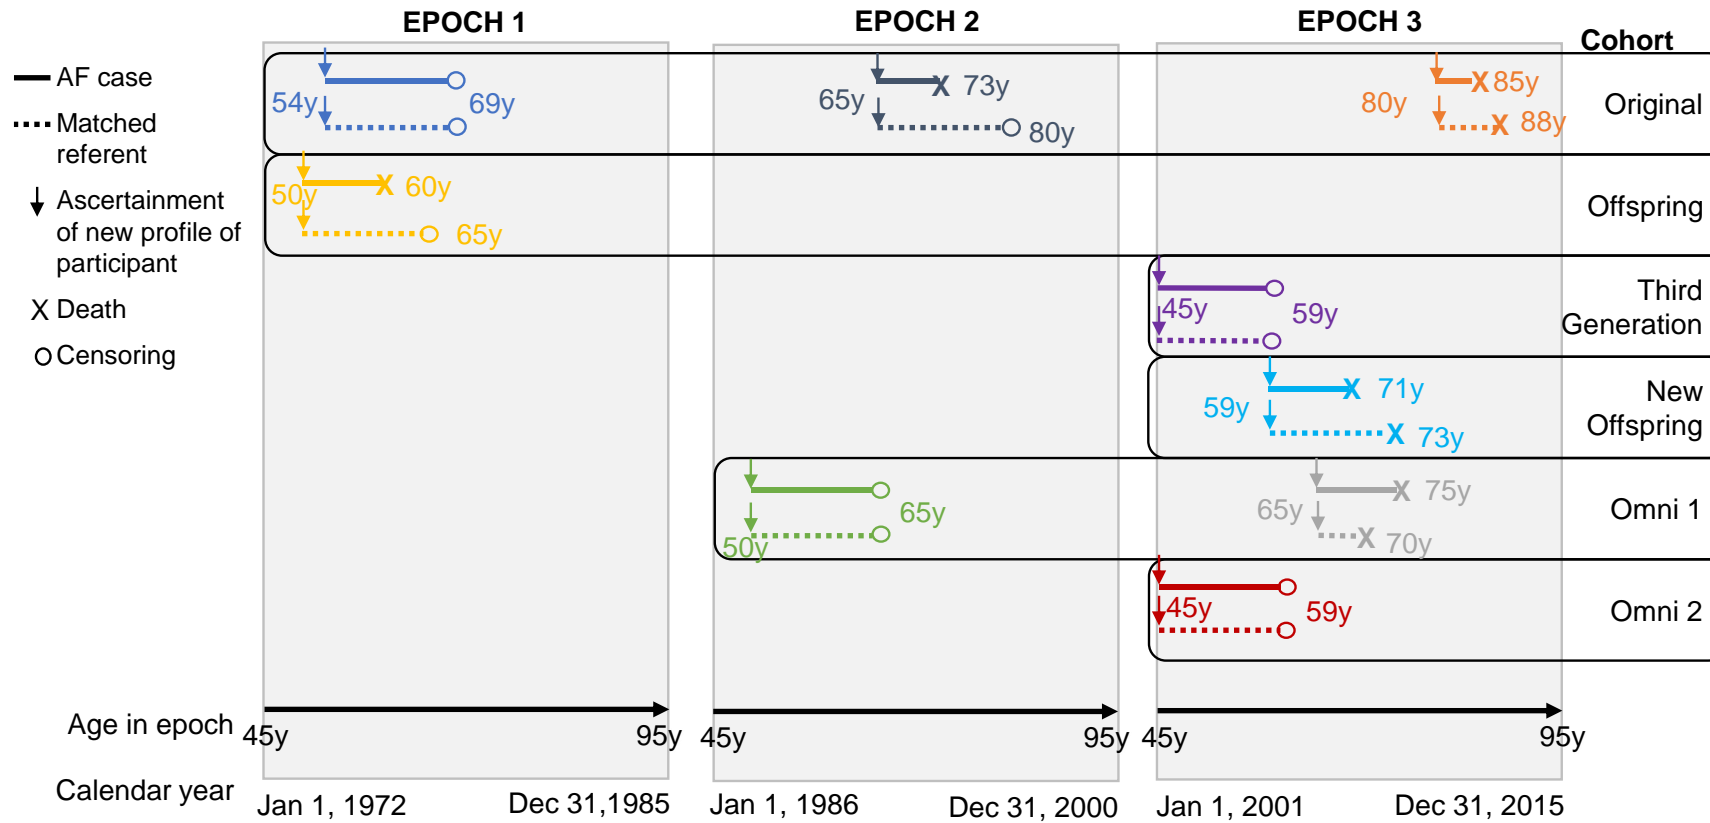

Figure S3. Illness-death model

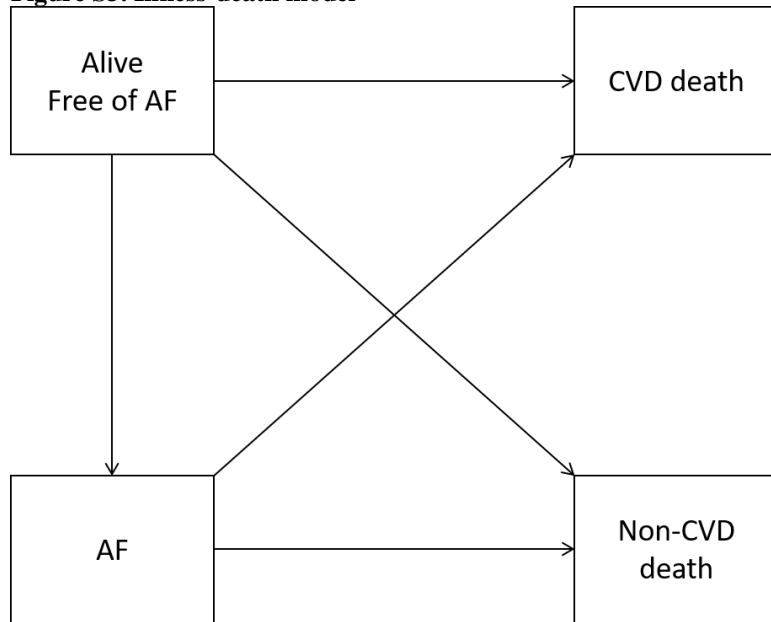

In the illness-death model, individuals start alive and free of AF; they can eventually develop AF before they transition to CVD death or non-CVD death.

Supplement—Vinter et al. Temporal trends in the association between newly-diagnosed AF and death

Figure S4. Flow diagrams depicting the selection of participants

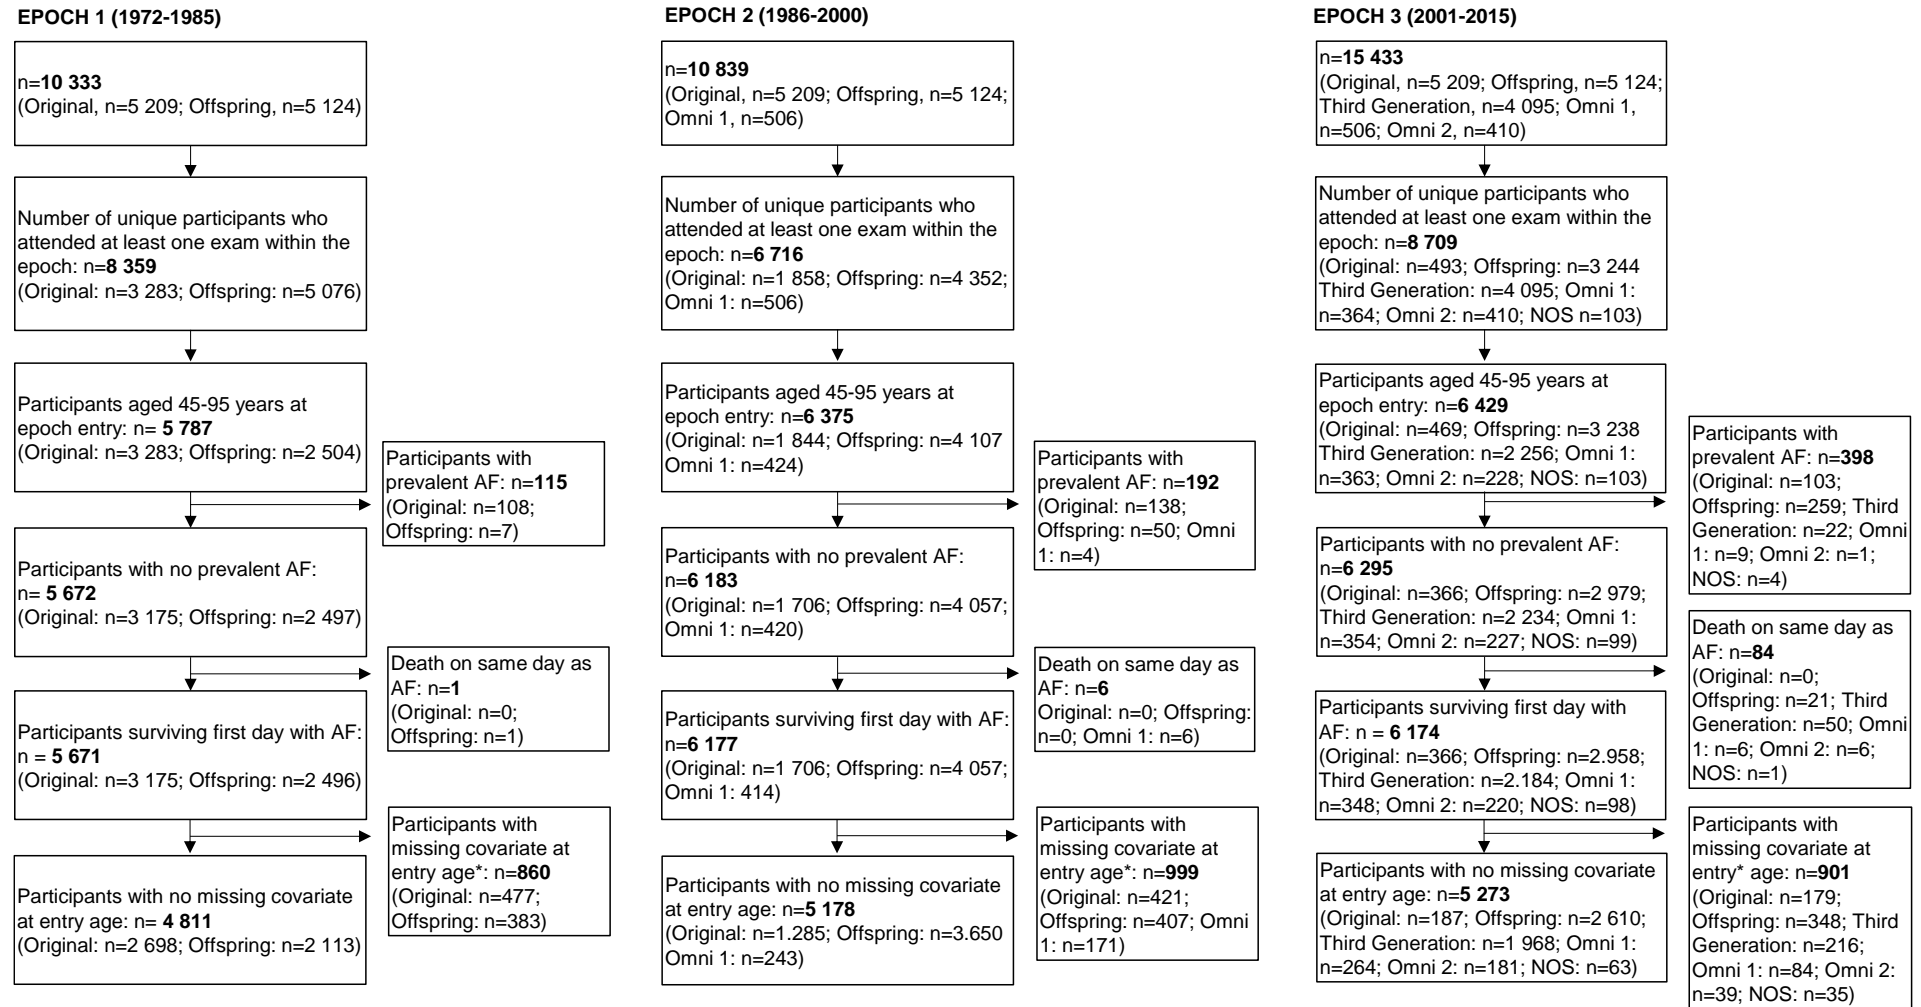

At entry age, 15.2%(860/5671) in epoch 1, 16.2% (999/6177) in epoch 2, and 14.6% (901/6174) in epoch 3 had one or more missing covariates. We used multiple imputation analyses to account for missing values.

Figure S5. Adjusted survival curves for women with atrial fibrillation and matched referents

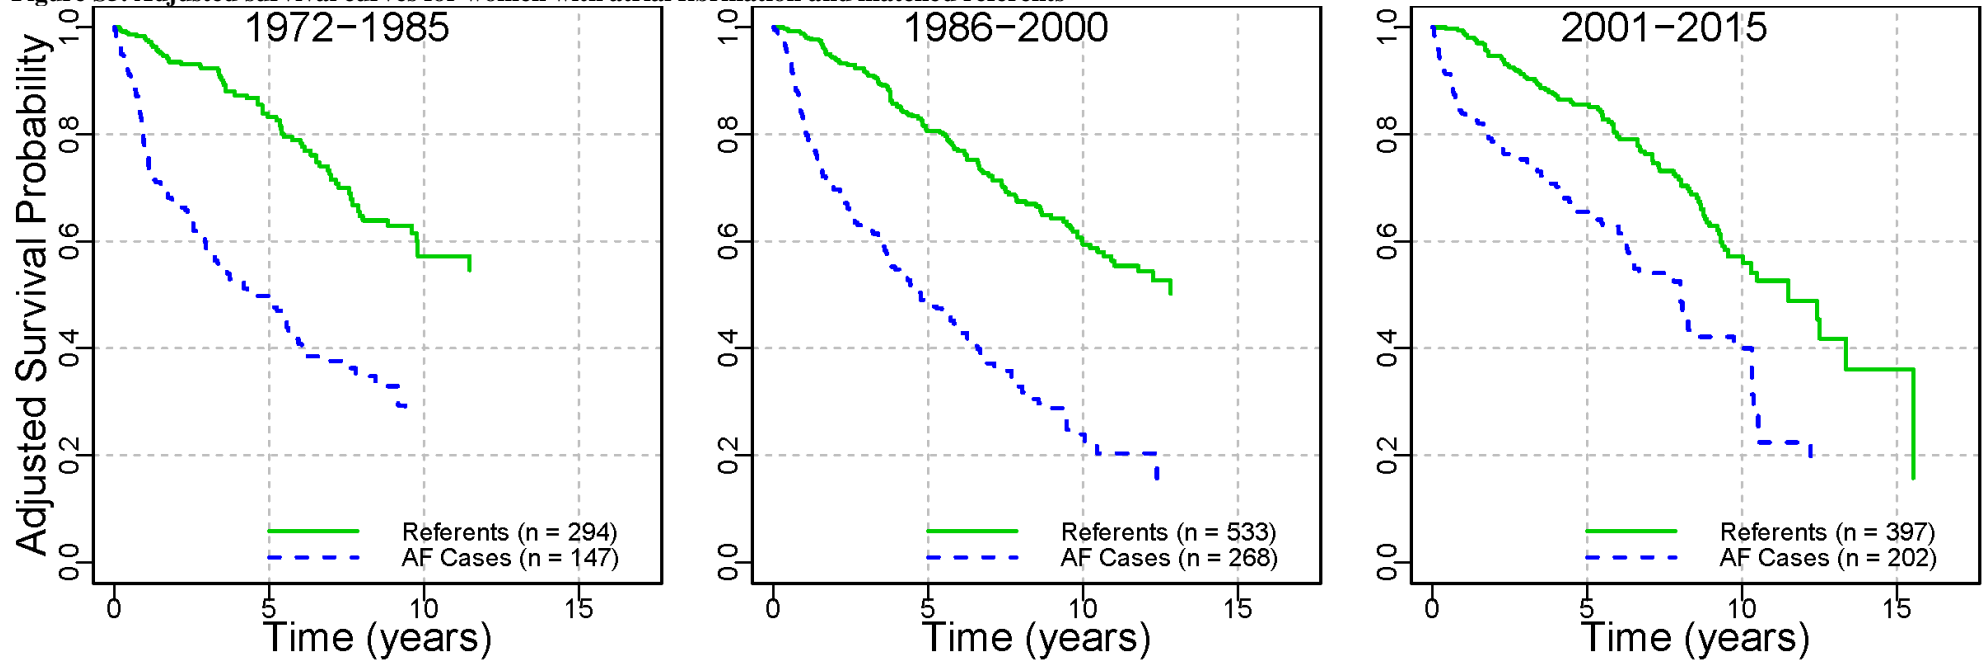

Analyses are adjusted for clinical covariates listed in table 1. Adjusted difference in restricted mean survival times -3.01 years (-3.52, -2.50), -2.91 (-3.28, -2.54), and -1.78 years (-2.20, -1.36) in epoch 1, 2, and 3, respectively (trend  $p=0.04$ ).

Figure S6. Adjusted survival curves for men with atrial fibrillation and matched referents

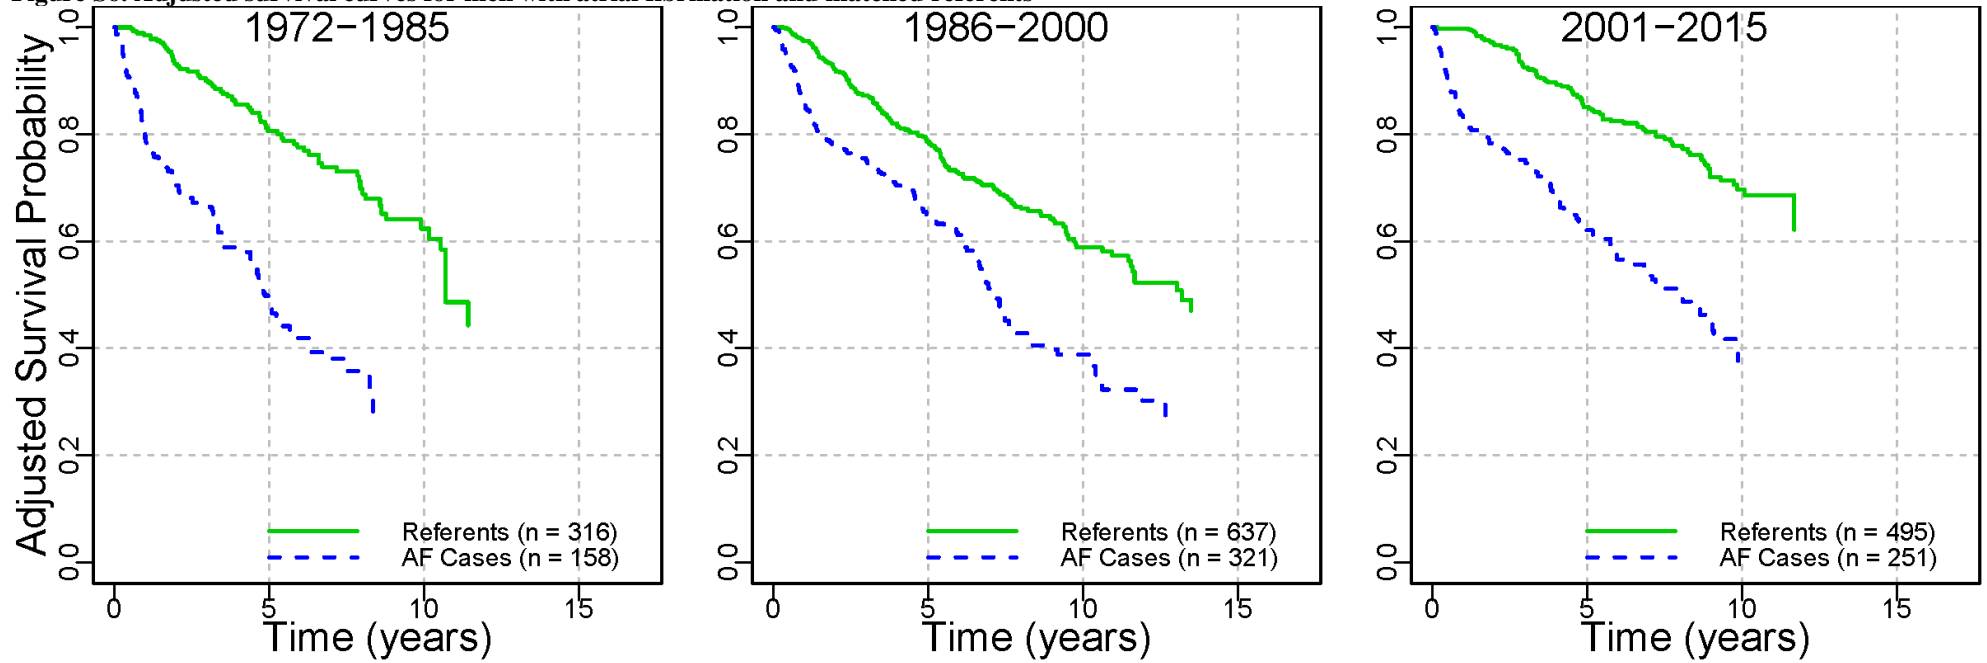

Analyses are adjusted for clinical covariates listed in table 1. Adjusted difference in restricted mean survival times -2.89 years (-3.38, -2.40), -1.52 years (-1.87, -1.18), and -2.23 years (-2.59, -1.86) in epoch 1, 2, and 3, respectively (trend p=0.59)

Figure S7. Adjusted survival curves for AF cases detected from outside medical records and matched referents

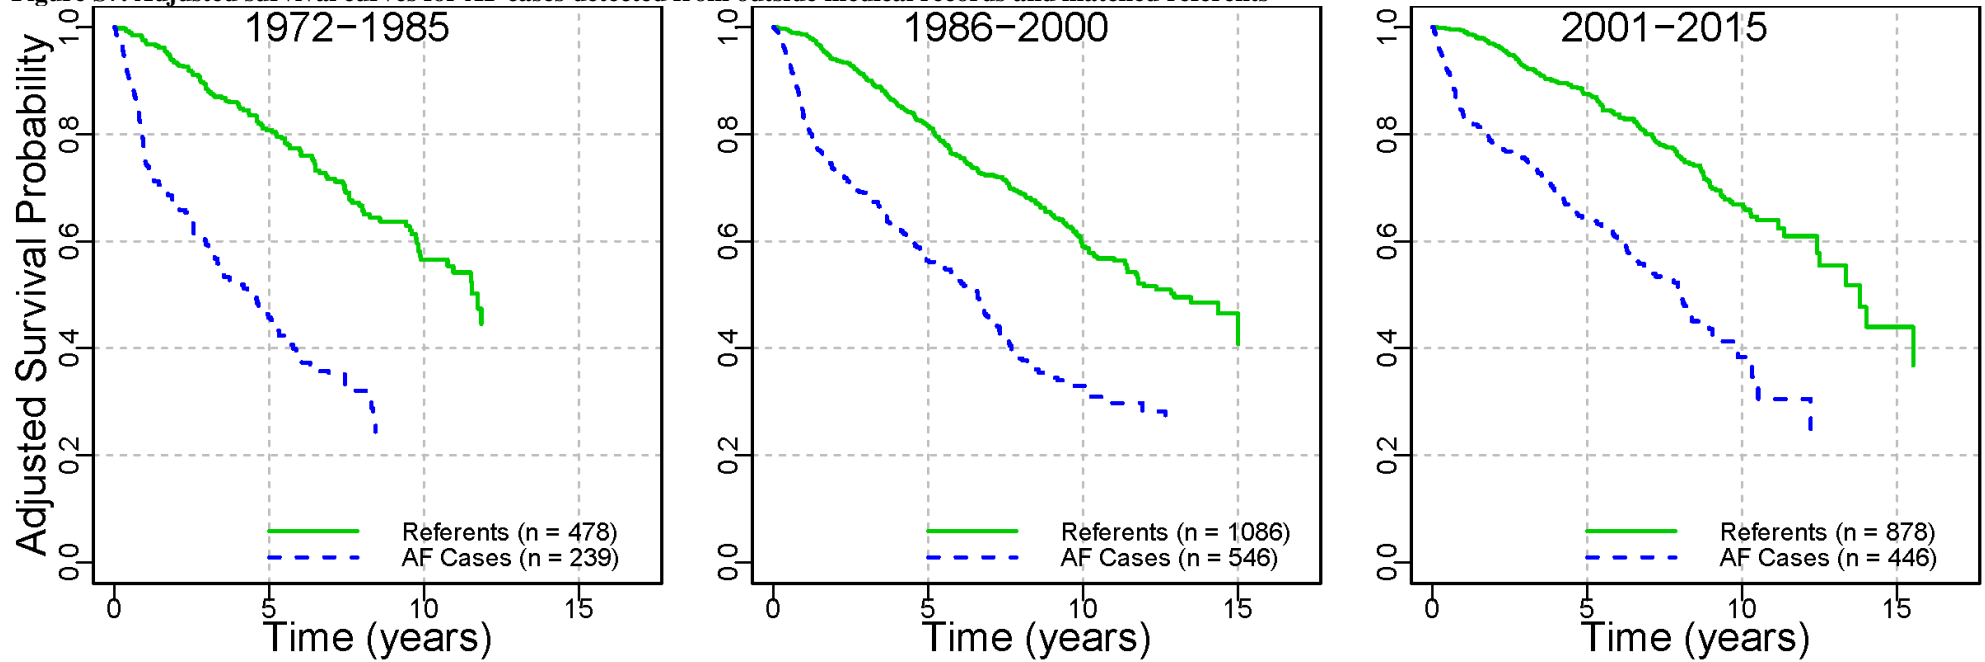

We discarded AF cases detected during a Framingham Heart Study visit at the time of diagnosis. Analyses are adjusted for clinical covariates listed in table 1. Adjusted difference in restricted mean survival times -3.13 years (-3.53, -2.73), -2.31 years (-2.57, -2.05), and -2.12 years (-2.39, -1.85) in epoch 1, 2, and 3, respectively (trend  $p=0.01$ )

Figure S8. Adjusted survival curves for AF cases without secondary precipitants and matched referents

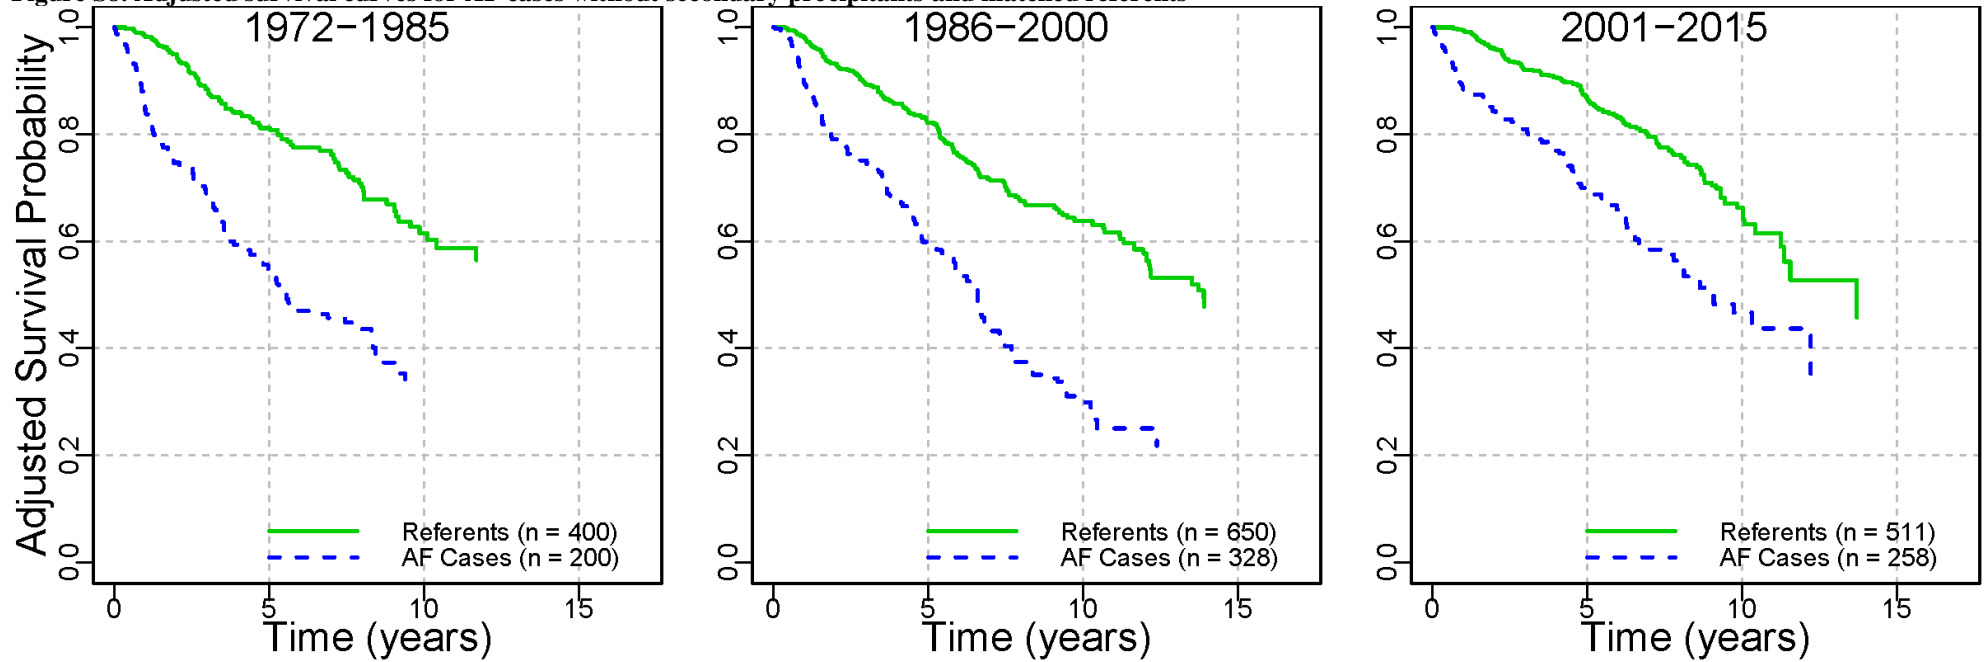

We discarded AF cases associated with an acute reversible precipitant. Analyses are adjusted for clinical covariates listed in table 1. Adjusted difference in restricted mean survival times -2.34 years (-2.78, -1.90), -2.04 years (-2.37, -1.71), and -1.54 years (-1.89, -1.19) in epoch 1, 2, and 3, respectively (trend  $p=0.004$ )



Figure S9. Cumulative incidence function for cardiovascular death

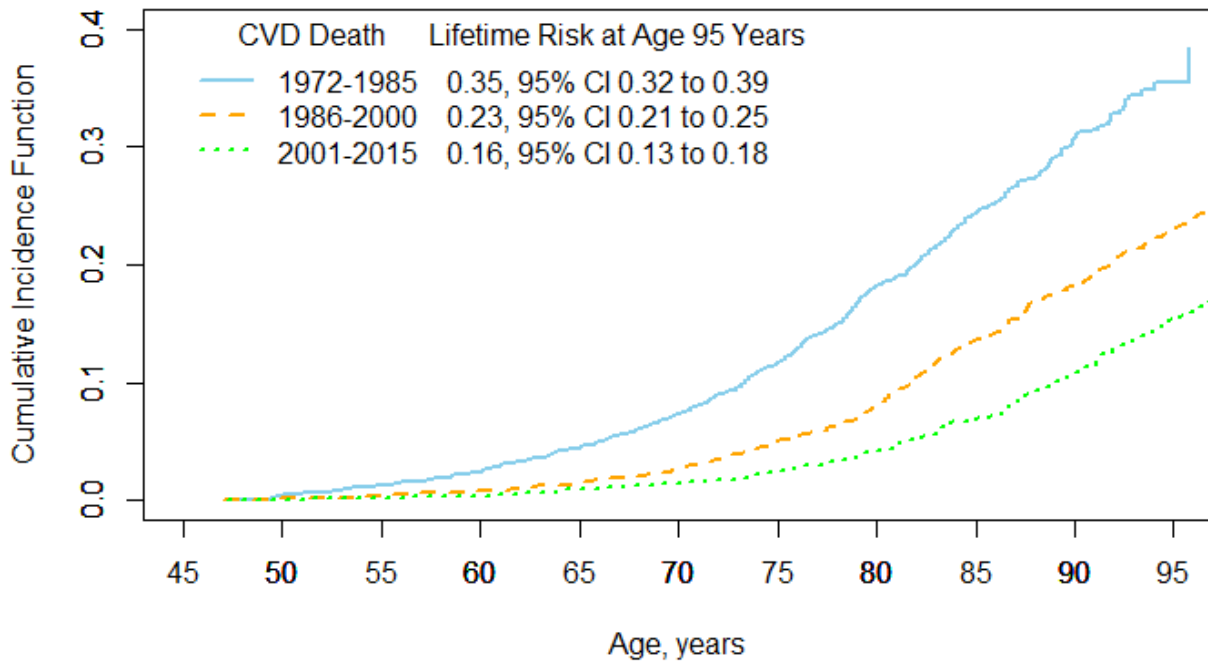

Figure S10. Cumulative incidence function for non-cardiovascular death

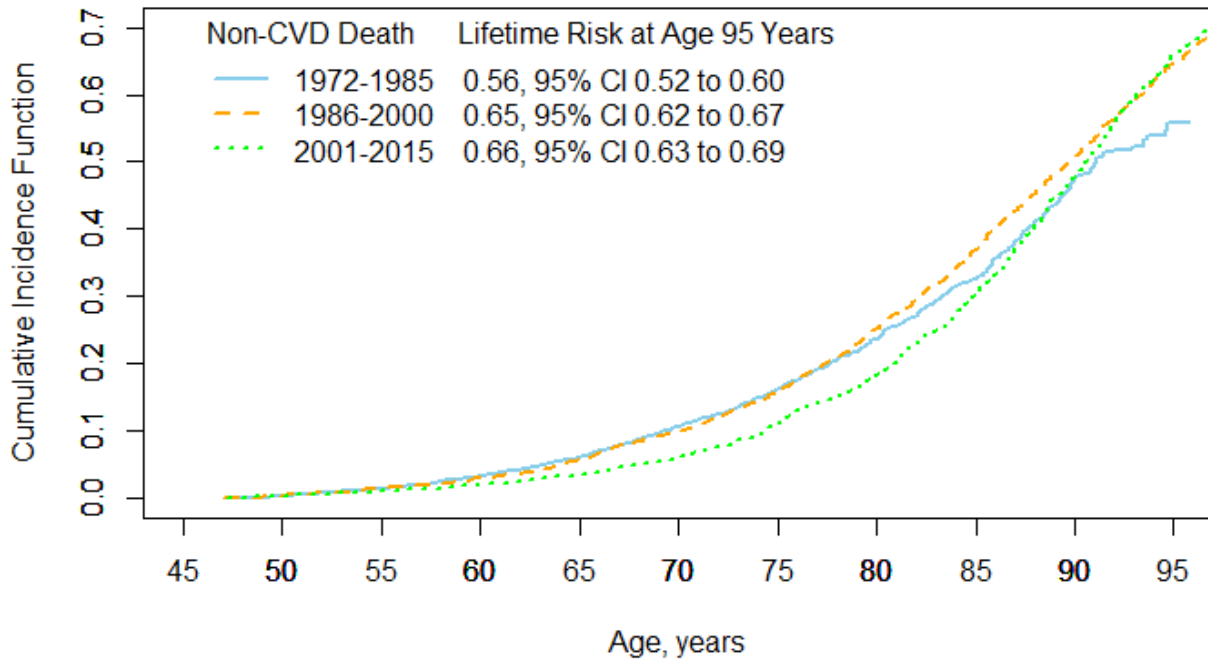

Supplement: vinn053803.ww.pdf [file vinn053803.ww.pdf]
